# Supplementary material for: High circulating fibroblast growth factor-21 levels as a screening marker in fatty pancreas patients
Source: PeerJ. 2023 Apr 12;11:e15176. doi: 10.7717/peerj.15176 (PMC10105565; doi:10.7717/peerj.15176)
Supplement: Supplemental Information 2 [file peerj-11-15176-s002.xlsx]

## Sheet: Sheet1
Group	Age	Gender	Height	Weight	Smoking	Drinking	FP	ALT	AST	GGT	Cr	BUN	UA	GLU	CHO	FGF21
Control	20	Male	177.5	64	NO	YES	NO	4.2	8	13.1	12.3	77.8	5.32	453.3	5.07	155.27
Control	20	Female	162	54	NO	NO	NO	1.8	13	14.6	9.5	57.1	6.61	298.6	4.79	94.93
FP	21	Male	176.5	98	YES	NO	YES	3.3	90	28.2	60.3	75.7	6.23	431.2	4.57	379.72
FP	23	Male	171	90	YES	NO	YES	3.5	84	32	83.4	41.3	3.05	507.6	5.98	273.53
FP	25	Male	187	105	YES	YES	YES	2.1	69	35.4	32.7	80.4	4.4	441.5	5.14	99.75
FP	26	Male	164	85	NO	NO	YES	2.9	96	40.7	42.8	79.3	3.4	557.9	5.06	114.24
Control	26	Female	161	52	NO	NO	NO	7.8	21.7	16	11.9	57.4	4.89	248.7	5.2	167.33
FP	26	Female	170	115	NO	NO	YES	2.1	24	18.6	22.1	59.7	5.24	359.4	4.62	225.26
Control	27	Female	167.5	54	NO	NO	NO	4	14	15.2	14.1	58.4	5.48	248.2	5.02	169.75
FP	27	Female	184.5	119	NO	NO	YES	2.6	12.1	22.1	35.1	58.7	4.2	409.7	4.95	155.27
FP	27	Female	158	66	NO	NO	YES	3.7	10	11	19	51	5.13	291	4.69	237.32
FP	28	Male	176	83	NO	NO	YES	2.2	19	15.8	38.5	80.9	5.32	566.3	4.82	271.11
Control	28	Female	163.5	54	NO	NO	NO	4.9	22	20	20.5	59.1	1.22	261.9	4.73	157.68
FP	30	Male	188.5	79	NO	YES	YES	3.3	10	14.6	22.2	74.6	5.02	432.2	4.83	148.02
Control	31	Male	171.1	70	NO	NO	NO	6.1	40	21.1	54.4	72.2	5.96	325.7	5.03	159.4
Control	31	Female	164	56	NO	NO	NO	3.7	8	12.1	10.8	63.9	4.04	231.4	5.08	350.76
FP	32	Male	171	69	NO	NO	YES	1.3	99	39	45	74	5.43	329	5.43	497.98
FP	32	Male	176.5	63	NO	NO	YES	3.5	27	18.9	20.8	76.1	4	372.8	4.83	326.62
FP	33	Female	172	67	NO	NO	YES	2	5.8	12.1	12.3	54.8	4.93	286	4.95	34.59
FP	35	Male	171	68	YES	YES	YES	6	17.7	22.3	83.8	99.8	5.82	409.1	5.26	751.4
FP	36	Male	173	65	NO	NO	YES	3.2	44	23.4	55	75.3	7.99	342.2	4.51	176.99
FP	36	Male	172	76	NO	NO	YES	2.9	28	17	28	92	5.88	387	5.39	275.94
FP	36	Male	175	75	YES	YES	YES	4.2	15	22	26	93	4.83	506	5.47	444.89
FP	37	Female	168	90	NO	NO	YES	2.1	53	29	55	48	4.92	400	5.69	63.55
Control	37	Male	172	64	NO	YES	NO	4.8	35	23.2	13.7	89.5	6.4	363.9	5.12	370.07
FP	38	Male	172.5	73	NO	YES	YES	3.2	20	21.2	45	75.1	4.91	286	7.41	203.54
FP	39	Male	170.5	91	NO	NO	YES	3.3	45	28.7	41.1	84.4	6.24	387.1	5.12	546.25
FP	39	Female	165	79	NO	NO	YES	2.4	57	28.1	57.3	57.7	3.53	295.4	5.71	148.02
FP	39	Male	173.5	76	YES	YES	YES	3.7	18	14.7	39.6	85.6	7.17	434.1	5.05	514.88
Control	39	Male	179.5	60	NO	NO	NO	3.5	30	16.2	19.6	58.3	4.83	299	4.8	278.35
FP	40	Female	160	85	NO	NO	YES	2.3	16	10	17	61	3.98	345	5.44	225.26
FP	40	Male	169	66	NO	NO	YES	2.2	77	27.3	79.4	82.1	4.25	330.9	5.79	850.35
Control	40	Female	162.5	63	NO	NO	NO	3.3	23	18.1	13.6	92.8	1.94	242.7	4.95	82.86
FP	41	Male	185	95	NO	NO	YES	3.8	31	16	35	82	4.24	326	5.54	546.25
FP	41	Male	178.5	87	YES	YES	YES	4.4	42	27.3	43.6	61.3	3.72	283.3	8.51	220.43
FP	41	Male	179.5	75	NO	NO	YES	2.8	18	19.4	11.8	78.4	3.8	350.9	5.36	283.18
FP	41	Female	161	64	NO	NO	YES	3.2	18	18	9	58	5.73	296	4.99	616.24
FP	42	Male	178.5	81	NO	NO	YES	2.4	13	13.3	35.7	102	7.59	476.9	6.29	280.77
Control	42	Female	166	61	NO	NO	NO	2.8	9	16.4	15.6	69	5.31	246	5.04	244.56
FP	42	Female	161	60	NO	NO	YES	4.2	15	13.9	13.6	62.8	4.69	269.6	4.76	227.67
FP	42	Female	159.5	70	NO	NO	YES	4.4	31.2	22	29.7	46.5	3.17	279.2	4.86	331.45
FP	43	Male	172	85	NO	NO	YES	3.3	50	33.1	31.6	88.9	5.26	369.9	5.72	138.37
FP	43	Male	177.3	83	YES	YES	YES	3.9	28	23.8	51.1	53.2	4.09	391.5	5.48	652.45
FP	43	Male	181	84	NO	NO	YES	4	34	27.4	24.2	87.3	6.35	447.5	5.81	386.96
FP	43	Male	175	70	NO	NO	YES	4.7	29	21.1	21.9	90.9	5.55	260.7	5.44	604.18
Control	43	Male	168.5	65	YES	NO	NO	2.9	26	25.9	23.2	70.6	5.97	342	5.03	162.31
FP	43	Female	157.5	59	NO	NO	YES	4.5	10.7	17.2	17.5	58.4	4.12	256.7	5.09	401.44
FP	44	Male	171.5	77	NO	YES	YES	2.6	28	24.1	30	78.1	4.36	353.8	4.86	140.78
FP	44	Male	178	79	NO	NO	YES	3.7	17	21.6	17.7	97.7	6.76	470.5	7.27	469.02
FP	44	Male	174	77	NO	NO	YES	3.6	15	16	43	82	4.73	356	5.52	461.78
FP	45	Male	175.5	84	NO	NO	YES	3.6	21.2	18.1	47.1	87.8	8.05	424.1	5.29	326.62
FP	45	Male	170	77	NO	YES	YES	4.6	28.2	20.8	27.3	83.6	5.18	364.4	5.3	1055.5
FP	45	Female	161	53	NO	NO	YES	4.7	5	15.4	19.5	40.8	3.42	279.8	5.89	389.37
FP	45	Male	178	72	NO	NO	YES	4.3	14	14.7	13.8	96.4	7.12	349.4	4.99	611.42
FP	45	Male	176	80	NO	NO	YES	5.2	35	22	39	72	4.69	393	5.85	350.76
FP	46	Male	172	81	NO	YES	YES	6.8	24	19	19	84	4.97	420	4.65	442.47
FP	46	Male	174	75	YES	NO	YES	2.9	31.3	23.9	34.4	71.1	4.66	338.7	6.64	420.75
FP	46	Male	170	65	NO	NO	YES	3.7	20.1	14.3	33.9	98.6	3.5	437	5.05	273.53
FP	46	Male	168.5	77	NO	NO	YES	2.7	58	42.3	23	68.6	3.67	317	4.85	290.42
FP	47	Male	167	74	NO	YES	YES	2	10	20.4	36.5	100.2	5.9	322.3	5.18	218.02
FP	48	Male	182.9	79	NO	NO	YES	3.8	31	20	41	72	5.32	256	4.95	408.68
FP	48	Female	163	62	NO	NO	YES	2.3	9	15.8	24.1	71	4.65	333.6	5.11	309.73
FP	49	Male	174	70	YES	YES	YES	3.6	22	21.2	40.7	70.9	5.41	388.6	5.76	536.6
FP	49	Female	166.2	65	NO	NO	YES	4.1	16	18.7	13.9	70.3	4.71	204.1	5.55	102.17
FP	49	Female	162	68	NO	NO	YES	2.8	20	21.2	18.6	65.5	5.27	414	9.25	391.79
FP	49	Female	169.1	65	NO	NO	YES	3.5	32	25.3	16.5	72.5	3.94	314.7	5.03	473.85
Control	50	Male	173	70	NO	YES	NO	7.7	19	26.8	15	84.7	3.86	279	4.89	107
FP	50	Male	169	71	NO	NO	YES	4.3	43	31	37	80	4.07	393	5.05	227.67
Control	50	Male	166.5	63	YES	YES	NO	1.3	151	177.8	48	86.3	5.41	294.7	4.7	297.66
Control	50	Female	158	58	NO	NO	NO	3.7	47	32.2	10.3	58.9	5.76	256.9	5.34	157.68
FP	50	Female	166	67	NO	NO	YES	3.2	11	13	10	61	7.99	284	8.13	263.87
FP	50	Female	157.5	60	NO	NO	YES	4.5	15	17	13	50	3.55	262	5.9	92.51
FP	51	Male	169	67	YES	YES	YES	3.3	12	16	21	92	5.76	433	5.51	172.16
FP	52	Male	166.5	70	YES	NO	YES	4.5	12	13.6	15	53.9	6.76	247	5.46	787.6
FP	52	Male	168.5	76	NO	YES	YES	3.1	26.1	17.4	23.9	75.7	5.66	404.3	6.11	454.54
FP	52	Female	161.5	69	NO	NO	YES	3.4	16.6	14.6	16.2	56.5	4.09	189.2	5.24	377.31
FP	52	Female	172	92	NO	NO	YES	6.3	21.4	25.3	18.6	59.9	4.46	325.2	5.45	87.69
FP	53	Male	179	89	YES	YES	YES	3.4	38	25	51	73	6.65	269	10.21	565.56
FP	53	Female	162.5	57	NO	NO	YES	2.9	68	36.9	37.9	52.2	3.87	309.9	7.35	372.48
FP	54	Female	155.5	67	NO	NO	YES	4.5	76.9	53.8	132.5	68.8	6.1	376.4	6.23	268.7
FP	55	Male	168.5	63	YES	YES	YES	2.7	8.9	10.9	24.9	67.5	7.03	239.4	13.9	321.8
Control	55	Female	164	64	NO	NO	NO	4.3	27	23.4	21.2	62	5.7	281.2	4.61	126.3
FP	55	Female	158	59	NO	NO	YES	3.2	24	18	19	52	4.68	274	15.76	148.02
FP	55	Female	159	54	NO	NO	YES	3.9	17.5	18.9	15.9	67.3	3.92	291.6	7.37	336.28
FP	55	Female	163.9	74	NO	NO	YES	3.7	15.5	19	16.8	64.4	6.1	406.4	5.4	297.66
FP	56	Female	159	56	NO	NO	YES	3.8	15	17	28	60	8.92	306	5.65	254.22
FP	57	Male	167	67	YES	YES	YES	2.6	32.5	19.5	49.2	95.1	4.51	434.4	8.1	230.08
FP	58	Male	178.5	88	NO	NO	YES	3.7	22	20.5	27	73.2	5.78	391.2	4.81	174.57
FP	58	Male	171.5	71	NO	NO	YES	3.4	16	20.2	23.8	96.5	5.28	433.7	6.31	196.29
FP	58	Female	154	54	NO	NO	YES	4	21	25.2	31.2	59.6	4.94	371.7	5.46	215.6
FP	59	Male	175.5	76	NO	YES	YES	5.9	32	30	22.8	53.9	6.32	180.2	8.29	391.79
FP	59	Female	167	65	NO	NO	YES	3.3	20	18	15	56	6.45	334	4.85	360.41
FP	59	Female	169	63	NO	NO	YES	2.8	17	21.7	20.1	68.9	4.97	231.7	5.63	399.03
FP	59	Female	162	73	NO	NO	YES	4.6	12	19	21	58	5.87	319	5.67	338.69
Control	60	Male	168.7	62	YES	NO	NO	3.7	30	25.2	32.7	65.5	5.69	298.1	4.59	307.32
FP	60	Female	159.5	59	NO	NO	YES	3.1	14.1	15.9	17	51.4	3.54	293.7	6	128.72
FP	60	Female	171	76	NO	NO	YES	3.7	25.1	22.9	34.3	76.3	6.22	372.7	6.12	184.23
FP	60	Female	155.5	58	NO	NO	YES	2.5	31	29.1	30.1	68.9	3.49	217.1	7.51	239.74
FP	61	Male	183.5	77	NO	NO	YES	4	17.9	19.1	33	59.9	3.74	441.4	6.27	348.35
FP	61	Female	166.5	61	NO	NO	YES	3.9	12.9	15.8	11.8	47.6	7.69	226.5	5.61	41.83
FP	61	Female	161.5	67	NO	NO	YES	5.8	15.2	22.7	11.7	57.7	3.72	321.2	6.34	464.19
FP	61	Female	159.5	63	NO	NO	YES	4.1	46	31.2	32	58.6	4.11	297.1	10.23	220.43
FP	62	Male	165.8	76	NO	NO	YES	8.3	184.3	63.9	228.6	116.4	6.79	474.7	8.32	394.2
Control	62	Male	170	65	NO	NO	NO	5.2	22	18.2	14.2	61.5	5.76	265.4	4.95	283.18
FP	63	Male	168.5	83	NO	NO	YES	1.8	38	18.4	44.2	66.1	5.56	314	5.41	642.79
FP	63	Female	167	68	NO	NO	YES	4.1	14	16.3	14.2	70.8	4.52	322.6	6.22	415.92
FP	63	Male	179	75	NO	NO	YES	3.3	16	17.1	22.6	68.3	4.34	298	5.16	234.91
FP	63	Female	159	56	NO	NO	YES	4.5	16	20	38	60	7.05	258	4.98	189.05
FP	63	Male	171	67	NO	NO	YES	3.4	16	16.2	16.9	67.1	6.76	389.4	4.46	367.65
FP	63	Female	166	71	NO	NO	YES	5.3	16	22	13	61	6.63	337	6.06	316.97
FP	63	Female	158	60	NO	NO	YES	2.7	36	28.9	23.8	41.4	5.4	282	5.96	126.3
FP	64	Male	160.5	81	YES	NO	YES	6.4	284.3	207.3	428.6	51.1	5.87	217.5	5.33	99.75
FP	64	Male	168.9	78	NO	NO	YES	2.6	33	23.2	51.3	62.8	3.96	408.5	8.77	218.02
FP	64	Male	163	70	YES	YES	YES	5	15.6	19.1	19	101.7	5.82	230	5.53	169.75
FP	64	Male	162.5	66	NO	NO	YES	3.5	24.2	20.9	31.8	103.2	7.4	397	6.09	87.69
Control	64	Female	168.5	63	NO	NO	NO	4.8	74	48.9	18.7	67.2	5.03	236.1	4.76	186.64
FP	64	Female	158.5	59	NO	NO	YES	3.7	11	22.3	16.8	51.9	3.97	260.4	5.36	466.61
FP	65	Male	171.5	64	YES	YES	YES	5.1	16	15	26.9	57.9	4.45	307	5.09	191.47
